# Supplementary material
Source: HighWire-hosted journal article supplement (https://www.cmaj.ca/content/suppl/2002/10/16/167.5.521)
Supplement: Q8Net.pdf [file Q8Net.pdf]

## **CMAJ - Canadian Medical Association Journal**

### Results from the CMA's 2002 Physician Resource Questionnaire

#### **Internet use at the office or clinical practice, by activity**

Physicians who use the Internet at the office or clinical practice for various activities as a proportion of all respondents

|                                                    | <b>Overall</b> | <b>Female</b> | <b>Male</b> | <b>&lt; 35</b> | <b>35 - 44</b> | <b>45 - 54</b> | <b>55 - 64</b> | <b>65+</b> | <b>GP/FP</b> | <b>Med Spec</b> | <b>Surg Spec</b> | <b>Rural</b> | <b>Urban</b> |
|----------------------------------------------------|----------------|---------------|-------------|----------------|----------------|----------------|----------------|------------|--------------|-----------------|------------------|--------------|--------------|
| <b>Number of respondents</b>                       | 2882           | 912           | 1970        | 247            | 835            | 956            | 608            | 236        | 1484         | 1018            | 380              | 206          | 2676         |
| <b>Email</b>                                       | 45.6%          | 40.7%         | 81.9%       | 47.8%          | 47.6%          | 48.7%          | 43.3%          | 30.1%      | 33.5%        | 62.2%           | 48.7%            | 39.4%        | 46.0%        |
| <b>Worldwide web</b>                               | 48.6%          | 41.9%         | 51.7%       | 53.8%          | 54.4%          | 50.8%          | 43.3%          | 27.5%      | 37.5%        | 63.9%           | 50.8%            | 44.7%        | 48.9%        |
| <b>Discussion Groups</b>                           | 15.0%          | 11.2%         | 16.7%       | 9.7%           | 15.7%          | 18.3%          | 14.5%          | 5.5%       | 10.6%        | 20.4%           | 17.1%            | 13.6%        | 15.1%        |
| <b>Ordering documents, books</b>                   | 29.4%          | 23.2%         | 32.2%       | 32.4%          | 32.6%          | 32.1%          | 24.7%          | 16.1%      | 21.1%        | 40.4%           | 32.4%            | 29.1%        | 29.4%        |
| <b>MEDLINE searching</b>                           | 44.2%          | 38.8%         | 46.8%       | 49.0%          | 48.9%          | 46.7%          | 40.3%          | 23.3%      | 31.5%        | 61.8%           | 46.8%            | 35.4%        | 44.9%        |
| <b>Drug databases</b>                              | 27.2%          | 21.0%         | 30.1%       | 30.0%          | 30.5%          | 28.0%          | 24.5%          | 16.5%      | 21.2%        | 37.5%           | 23.2%            | 24.8%        | 27.4%        |
| <b>Browsing or reading online medical journals</b> | 38.2%          | 31.1%         | 41.3%       | 39.6%          | 41.6%          | 40.9%          | 34.2%          | 22.4%      | 27.5%        | 52.4%           | 41.3%            | 32.0%        | 38.6%        |
| <b>CME courses online</b>                          | 18.9%          | 13.8%         | 21.3%       | 15.8%          | 20.0%          | 20.2%          | 19.6%          | 11.9%      | 13.7%        | 26.2%           | 19.7%            | 15.0%        | 19.2%        |
| <b>CMA Online</b>                                  | 25.2%          | 19.2%         | 28.0%       | 30.4%          | 25.5%          | 26.9%          | 24.3%          | 14.0%      | 20.6%        | 32.2%           | 24.2%            | 27.7%        | 25.0%        |
| <b>CMA Infobase</b>                                | 17.1%          | 12.8%         | 19.0%       | 21.9%          | 17.6%          | 19.2%          | 14.3%          | 8.5%       | 15.8%        | 19.8%           | 14.7%            | 19.9%        | 16.9%        |
| <b>Classified ads, placements</b>                  | 9.9%           | 7.0%          | 11.2%       | 15.4%          | 11.1%          | 10.6%          | 7.4%           | 3.0%       | 8.7%         | 12.4%           | 7.6%             | 10.7%        | 9.8%         |
| <b>Other physician-oriented web sites</b>          | 34.4%          | 29.2%         | 36.8%       | 39.7%          | 39.5%          | 37.2%          | 28.9%          | 12.7%      | 27.0%        | 46.0%           | 31.8%            | 31.6%        | 34.6%        |
| <b>News in medicine, health care</b>               | 31.7%          | 26.6%         | 34.0%       | 32.8%          | 35.1%          | 34.3%          | 27.1%          | 19.5%      | 24.5%        | 41.7%           | 33.2%            | 29.6%        | 31.8%        |
| <b>Patient-oriented web sites</b>                  | 26.5%          | 24.0%         | 27.7%       | 29.6%          | 29.6%          | 29.7%          | 21.5%          | 12.3%      | 22.2%        | 33.3%           | 25.0%            | 25.7%        | 26.6%        |
| <b>Financial activities</b>                        | 24.8%          | 17.5%         | 28.1%       | 33.6%          | 27.4%          | 27.1%          | 19.4%          | 10.6%      | 19.9%        | 30.7%           | 27.9%            | 24.3%        | 24.8%        |
